# Supplementary material
Source: MDPI journal article supplement (https://www.mdpi.com/2073-4395/14/5/1028)
Supplement: s1 [file s1]

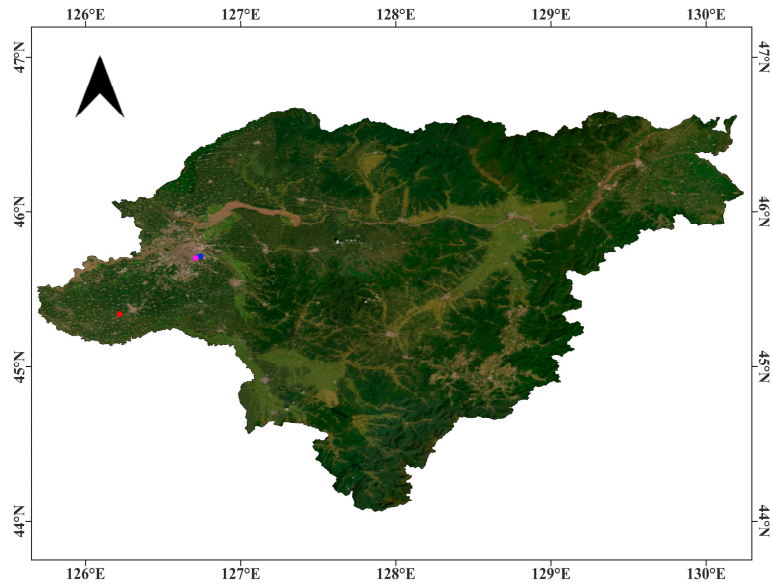

**Figure S1.** The location of the study sites, blue dot represent Site1 location, red dot represent Site2 location, and pink dot represent Site3 location.
